# Supplementary material
Source: PubMed Central journal article supplement (PMC9112882)
Supplement: aac.02406-21-s0001.pdf [file aac.02406-21-s0001.pdf]

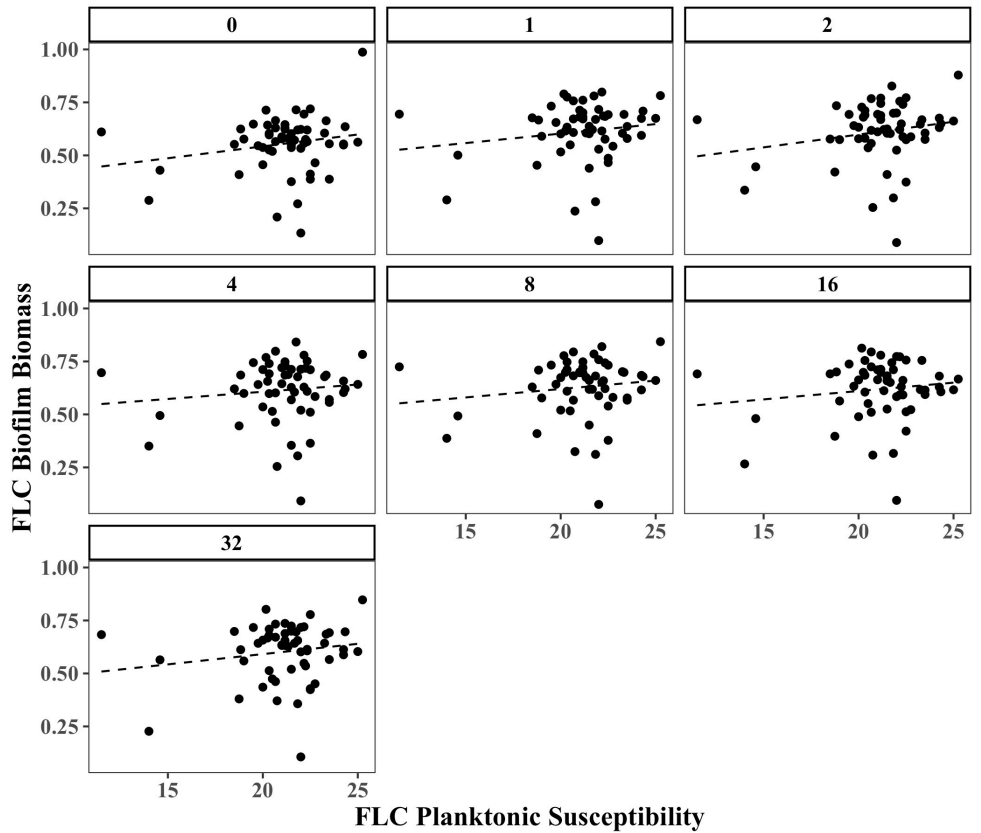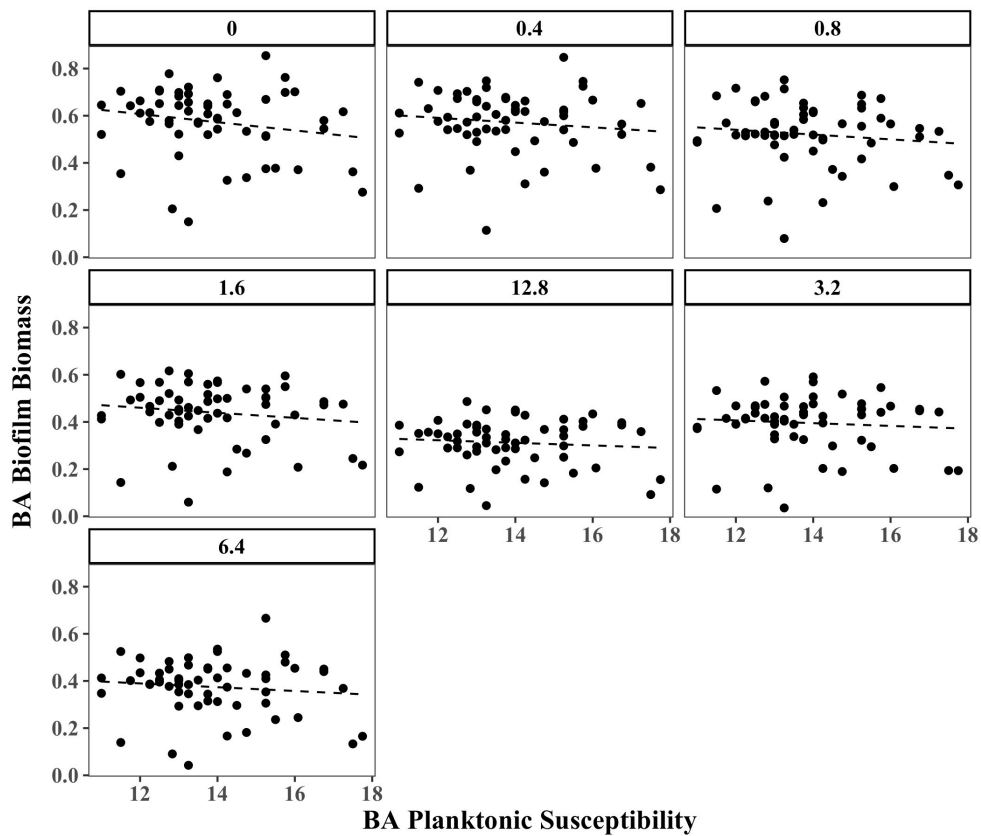

**Supplementary Figure 1:** Association of planktonic susceptibility and biofilm biomass of *C. albicans* isolates. There is no association between planktonic susceptibility and biomass of the biofilms for both FLC and BA (linear mixed-effect model).

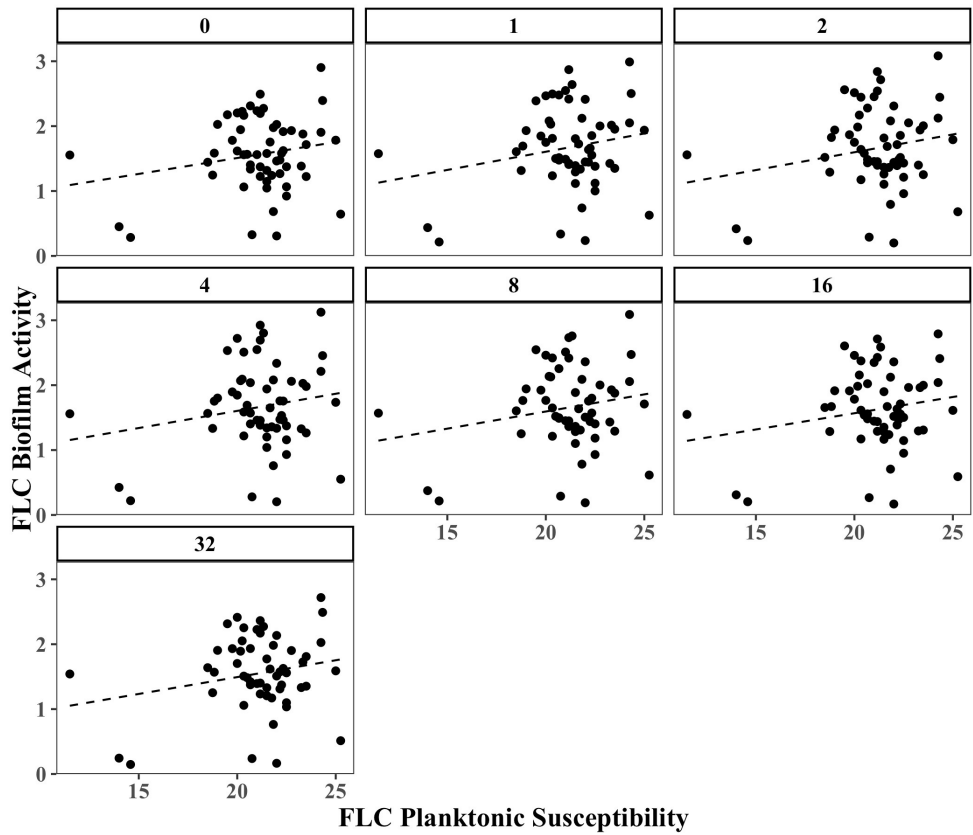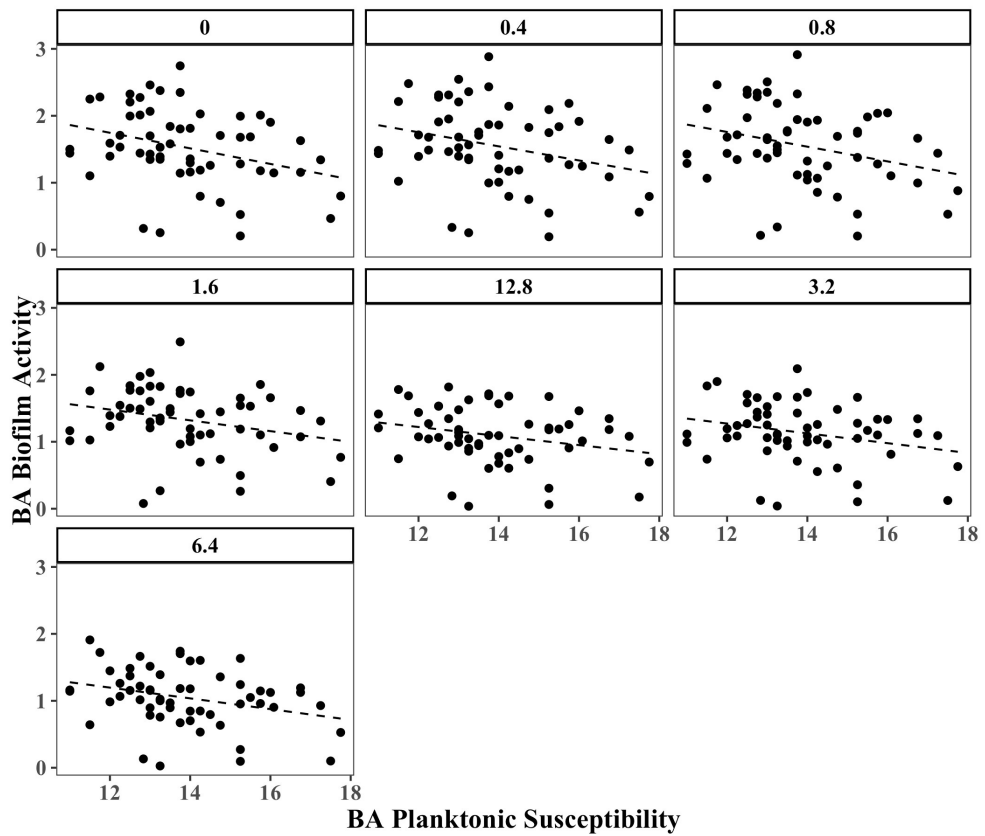

**Supplementary Figure 2:** Association of planktonic susceptibility and biofilm activity of *C. albicans* isolates. There is an association between BA planktonic susceptibility and biomass of the biofilms; however, this association is absent in FLC (linear mixed-effect model).

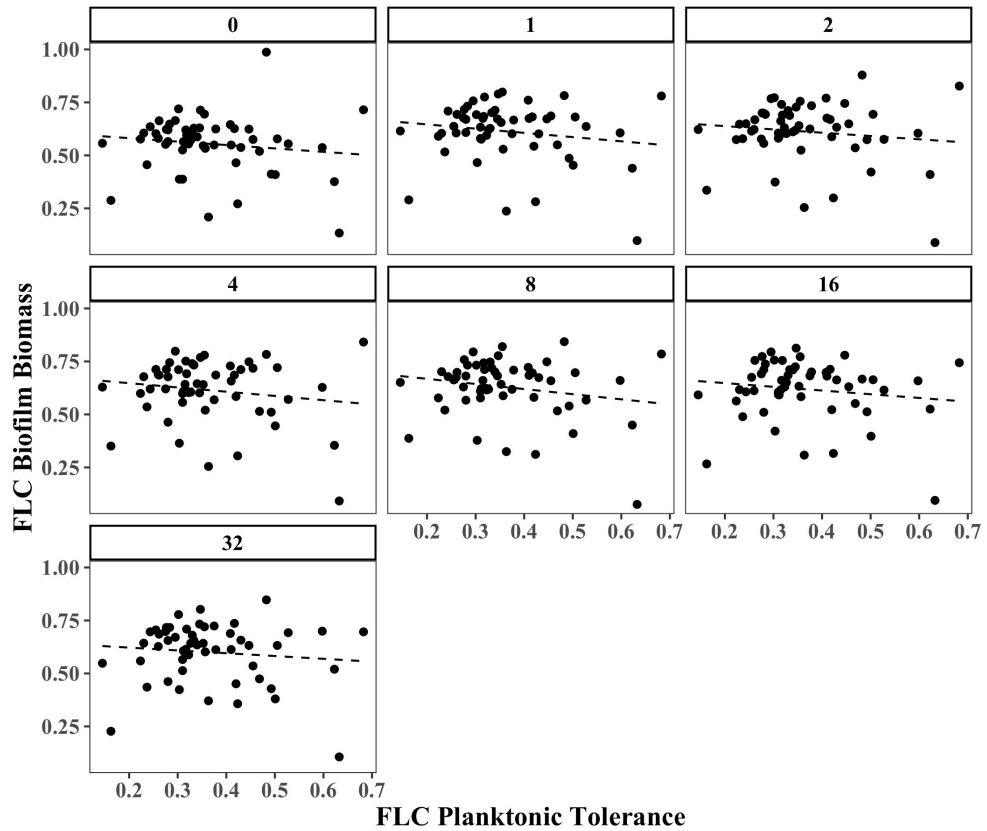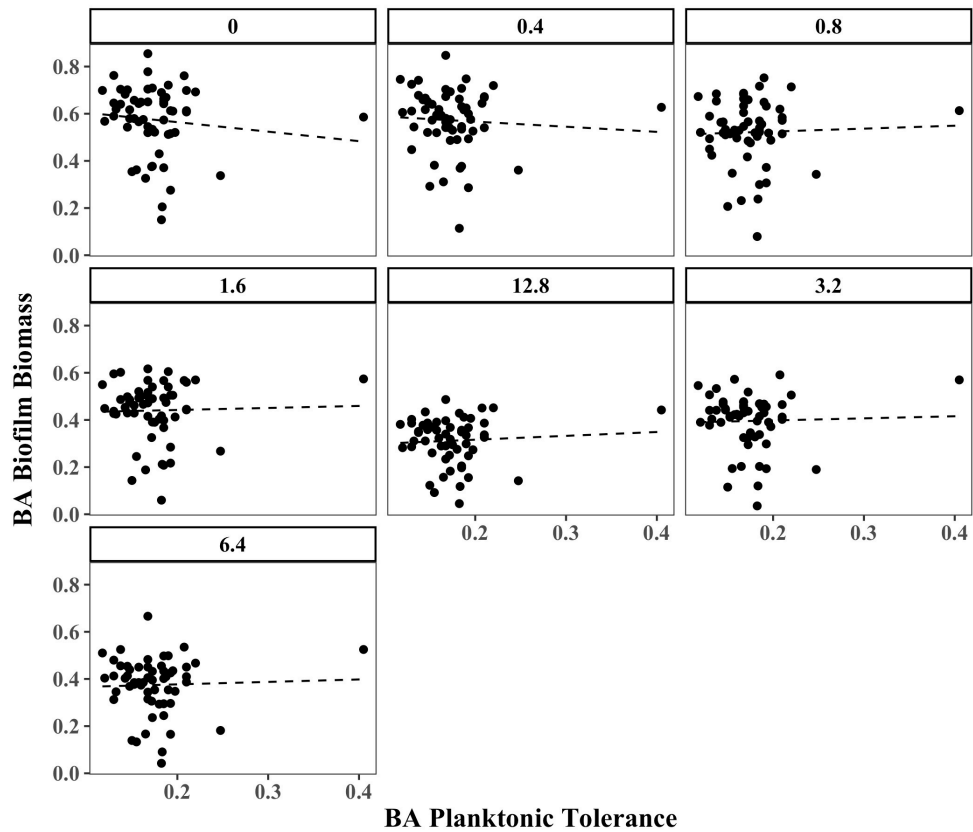

**Supplementary Figure 3:** Association of planktonic tolerance and biofilm biomass of *C. albicans* isolates. There is no association between planktonic tolerance and biomass of the biofilms for both FLC and BA (linear mixed-effect model).

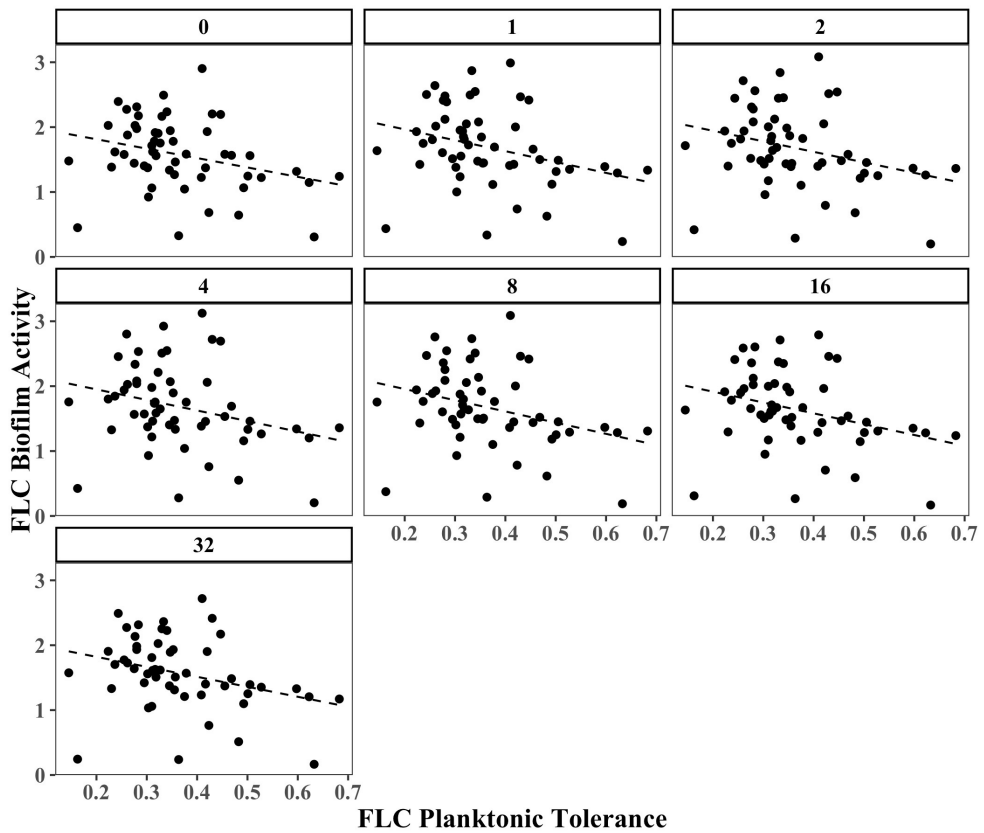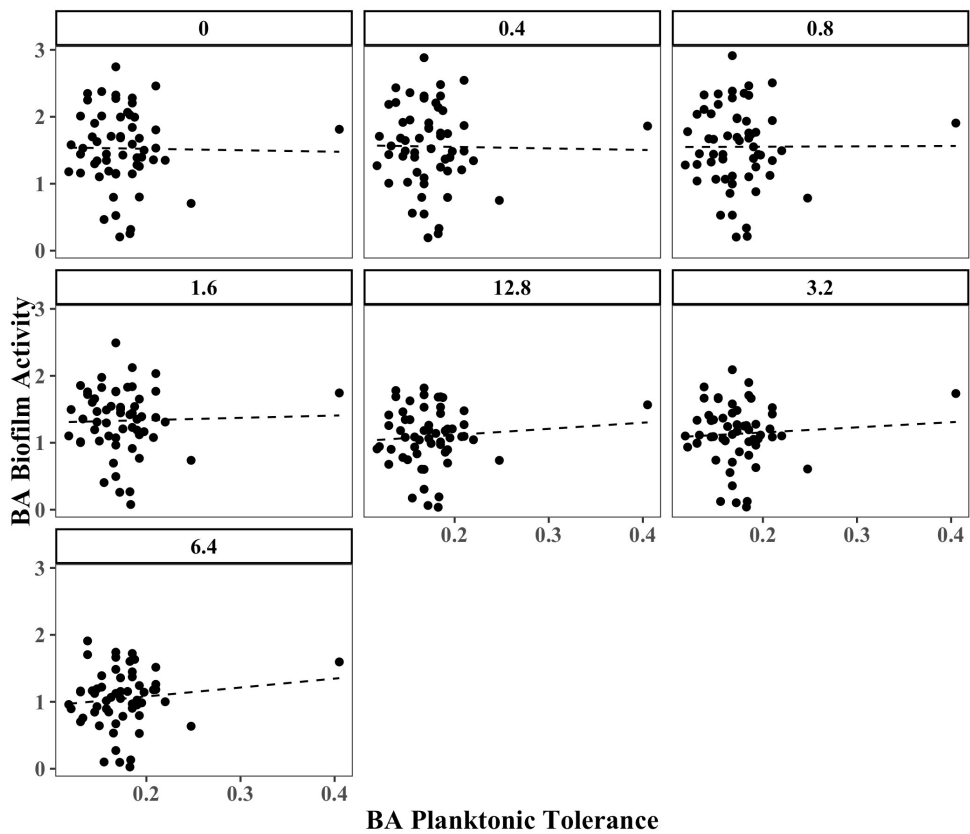

**Supplementary Figure 4:** Association of planktonic tolerance and biofilm activity of *C. albicans* isolates. There is an association between FLC planktonic tolerance and activity of the biofilms (linear mixed-effect model); however, this association is absent in BA.
